# Supplementary material for: The company you keep: health behavior among work peers
Source: Springer Nature journal article supplement (doi:10.1007/s10198-019-01124-4), 2019-10-29
Supplement: MOESM1 [file 17326780]

## Web appendix

Table A.1: Robustness: Three year windows

|                                     | (1)<br>General health check | (2)<br>PSA test     | (3)<br>Mammography  |
|-------------------------------------|-----------------------------|---------------------|---------------------|
| Peer behavior                       | 0.042***<br>(0.009)         | 0.013<br>(0.008)    | 0.023**<br>(0.008)  |
| Female                              | 0.041***<br>(0.003)         |                     |                     |
| Wage                                | 0.256***<br>(0.065)         | 0.488***<br>(0.055) | -0.086<br>(0.087)   |
| Lagged dependent variable           | 0.227***<br>(0.004)         | 0.290***<br>(0.009) | 0.283***<br>(0.007) |
| <i>Past healthcare utilization:</i> |                             |                     |                     |
| Outpatient expenditure              | 0.007***<br>(0.001)         | 0.005***<br>(0.001) | 0.012***<br>(0.002) |
| Days in hospital                    | -0.000<br>(0.000)           | 0.000<br>(0.000)    | 0.000<br>(0.000)    |
| Observations                        | 120,552                     | 72,166              | 44,887              |
| Mean of dept.                       | 0.257                       | 0.111               | 0.260               |

*Notes:* This table shows the estimation results for participation in general health screening (column (1)), prostate cancer screening (2), and mammography screening (3). Daily wage and outpatient expenditure are measured in thousand €. Regressions additionally control for individual age, place of residence, job type, business sector, firm location, firm size, and year of job move. Standard errors clustered at the firm level are shown in parentheses, \*  $p < 0.05$ , \*\*  $p < 0.01$ , and \*\*\*  $p < 0.001$ .

Table A.2: Robustness: Including short-term movers

|                                     | (1)<br>General health check | (2)<br>PSA test     | (3)<br>Mammography  |
|-------------------------------------|-----------------------------|---------------------|---------------------|
| Peer behavior                       | 0.036***<br>(0.007)         | 0.019**<br>(0.007)  | 0.023***<br>(0.007) |
| Female                              | 0.036***<br>(0.002)         |                     |                     |
| Wage                                | 0.130**<br>(0.042)          | 0.341***<br>(0.036) | 0.031<br>(0.058)    |
| Lagged dependent variable           | 0.244***<br>(0.003)         | 0.307***<br>(0.007) | 0.234***<br>(0.005) |
| <i>Past healthcare utilization:</i> |                             |                     |                     |
| Outpatient expenditure              | 0.008***<br>(0.001)         | 0.008***<br>(0.001) | 0.015***<br>(0.002) |
| Days in hospital                    | -0.000<br>(0.000)           | -0.000<br>(0.000)   | -0.000<br>(0.000)   |
| Observations                        | 209,438                     | 115,828             | 87,213              |
| Mean of dept.                       | 0.180                       | 0.076               | 0.158               |

*Notes:* This table shows the estimation results for general health screening (column (1)), prostate cancer screening (2), and mammography screening (3). Daily wage and outpatient expenditure are measured in thousand €. Regressions additionally control for individual age, place of residence, job type, business sector, firm location, firm size, and year of job move. Standard errors clustered at the firm level are shown in parentheses, \*  $p < 0.05$ , \*\*  $p < 0.01$ , and \*\*\*  $p < 0.001$ .

Table A.3: Robustness: Data since 2005

|                                     | (1)<br>General health check | (2)<br>PSA test     | (3)<br>Mammography  |
|-------------------------------------|-----------------------------|---------------------|---------------------|
| Peer behavior                       | 0.042***<br>(0.011)         | 0.021*<br>(0.009)   | 0.031***<br>(0.009) |
| Female                              | 0.040***<br>(0.003)         |                     |                     |
| Wage                                | 0.055<br>(0.051)            | 0.274***<br>(0.046) | -0.088<br>(0.073)   |
| Lagged dependent variable           | 0.238***<br>(0.004)         | 0.307***<br>(0.008) | 0.240***<br>(0.007) |
| <i>Past healthcare utilization:</i> |                             |                     |                     |
| Outpatient expenditures             | 0.006***<br>(0.001)         | 0.007***<br>(0.001) | 0.012***<br>(0.002) |
| Days in hospitals                   | -0.000<br>(0.000)           | 0.000<br>(0.000)    | -0.000<br>(0.000)   |
| Observations                        | 115,275                     | 66,031              | 46,037              |
| Mean of dept.                       | 0.191                       | 0.080               | 0.172               |

*Notes:* This table shows the estimation results for participation in general health screening (column (1)), prostate cancer screening (2), and mammography screening (3). Daily wage and outpatient expenditure are measured in thousand €. Regressions additionally control for individual age, place of residence, job type, business sector, firm location, firm size, and year of job move. Standard errors clustered at the firm level are shown in parentheses, \*  $p < 0.05$ , \*\*  $p < 0.01$ , and \*\*\*  $p < 0.001$ .

Table A.4: Robustness: Past 5 years healthcare utilization

|                                                                       | (1)<br>General health check | (2)<br>PSA test     | (3)<br>Mammography  |
|-----------------------------------------------------------------------|-----------------------------|---------------------|---------------------|
| Peer behavior                                                         | 0.032***<br>(0.008)         | 0.019**<br>(0.007)  | 0.027***<br>(0.008) |
| Female                                                                | 0.033***<br>(0.002)         |                     |                     |
| Wage                                                                  | 0.057<br>(0.044)            | 0.245***<br>(0.037) | -0.063<br>(0.061)   |
| <i>Number of screening participations five years before the move:</i> |                             |                     |                     |
| 1                                                                     | 0.147***<br>(0.003)         | 0.194***<br>(0.007) | 0.184***<br>(0.006) |
| 2                                                                     | 0.297***<br>(0.005)         | 0.363***<br>(0.012) | 0.354***<br>(0.008) |
| 3                                                                     | 0.448***<br>(0.008)         | 0.524***<br>(0.016) | 0.466***<br>(0.012) |
| 4                                                                     | 0.541***<br>(0.011)         | 0.629***<br>(0.020) | 0.550***<br>(0.021) |
| 5                                                                     | 0.628***<br>(0.014)         | 0.686***<br>(0.018) | 0.628***<br>(0.026) |
| <i>Past healthcare utilization</i>                                    |                             |                     |                     |
| Outpatient expenditure                                                | 0.000***<br>(0.000)         | 0.000***<br>(0.000) | 0.000***<br>(0.000) |
| Days in hospital                                                      | 0.000<br>(0.000)            | -0.000<br>(0.000)   | -0.000<br>(0.000)   |
| Observations                                                          | 168,441                     | 95,865              | 67,743              |
| Mean of dept.                                                         | 0.188                       | 0.079               | 0.172               |

*Notes:* This table shows the estimation results for participation in general health screening (column (1)), prostate cancer screening (2), and mammography screening (3). Daily wage and outpatient expenditure are measured in thousand €. Regressions additionally control for individual age, place of residence, job type, business sector, firm location, firm size, and year of job move. Standard errors clustered at the firm level are shown in parentheses, \*  $p < 0.05$ , \*\*  $p < 0.01$ , and \*\*\*  $p < 0.001$ .

Table A.5: Robustness: Screening experience and non-screeners

|                                     | (1)<br>General health check<br>experienced | (2)<br>General health check<br>not experienced | (3)<br>PSA test<br>experienced | (4)<br>PSA test<br>not experienced | (5)<br>Mammography<br>experienced | (6)<br>Mammography<br>not experienced |
|-------------------------------------|--------------------------------------------|------------------------------------------------|--------------------------------|------------------------------------|-----------------------------------|---------------------------------------|
| Peer behavior                       | 0.056*<br>(0.022)                          | 0.035***<br>(0.008)                            | 0.113*<br>(0.048)              | 0.013*<br>(0.007)                  | 0.026<br>(0.026)                  | 0.027***<br>(0.007)                   |
| Female                              | 0.037***<br>(0.008)                        | 0.038***<br>(0.002)                            |                                |                                    |                                   |                                       |
| Wage                                | -0.025<br>(0.116)                          | 0.190***<br>(0.047)                            | 0.490*<br>(0.231)              | 0.301***<br>(0.036)                | 0.131<br>(0.192)                  | -0.044<br>(0.064)                     |
| <i>Past healthcare utilization:</i> |                                            |                                                |                                |                                    |                                   |                                       |
| Outpatient expenditure              | 0.032***<br>(0.005)                        | 0.005***<br>(0.001)                            | 0.028**<br>(0.009)             | 0.006***<br>(0.001)                | 0.023***<br>(0.005)               | 0.012***<br>(0.002)                   |
| Days in hospitals                   | 0.000<br>(0.000)                           | -0.000<br>(0.000)                              | -0.001<br>(0.001)              | 0.000<br>(0.000)                   | -0.001<br>(0.001)                 | 0.000<br>(0.000)                      |
| Observations                        | 30,598                                     | 150,898                                        | 6,308                          | 96,641                             | 11,167                            | 62,169                                |
| Mean of dept.                       | 0.432                                      | 0.137                                          | 0.517                          | 0.050                              | 0.520                             | 0.109                                 |

*Notes:* This table shows the estimation results for participation in general health screening (column (1)), prostate cancer screening (2), and mammography screening (3). Daily wage and outpatient expenditure are measured in thousand €. Regressions additionally control for individual age, place of residence, job type, business sector, firm location, firm size, and year of job move. Standard errors clustered at the firm level are shown in parentheses, \*  $p < 0.05$ , \*\*  $p < 0.01$ , and \*\*\*  $p < 0.001$ .
